# Supplementary material for: Exogenous Fe2+ alleviated the toxicity of CuO nanoparticles on Pseudomonas tolaasii Y-11 under different nitrogen sources
Source: PeerJ. 2020 Nov 10;8:e10351. doi: 10.7717/peerj.10351 (PMC7664463; doi:10.7717/peerj.10351)
Supplement: Supplemental Information 1 [file peerj-08-10351-s001.docx]

Exogenous Fe2+ alleviated the toxicity of CuO nanoparticles on *Pseudomonas tolaasii* Y-11 under different nitrogen sources

Yuran Yang1, Can Zhang1, Xuejiao Huang1, Xuwei Gui1, Yifang Luo2, Zhenlun Li1*

1 Chongqing Key Laboratory of Soil Multiscale Interfacial Process, College of Resources and Environments, Southwest University, Chongqing, China

2 Chongqing Key Laboratory of plant disease biology, College of Plant Protection, Southwest University, Chongqing, China

*Corresponding Author:

Zhenlun Li

No. 2 Tiansheng Road, Tiansheng Street, Beibei District, Chongqing, 400715, China.

Email address: lizhlun4740@sina.com


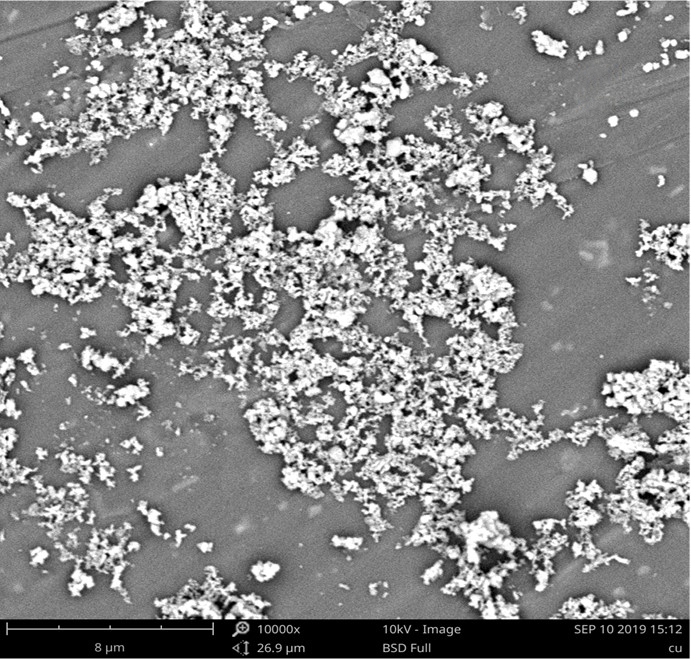


Suppl. Fig S1: SEM image of 2000 mg/L CuO-NPs.
