# Supplementary material for: Exogenous Fe2+ alleviated the toxicity of CuO nanoparticles on Pseudomonas tolaasii Y-11 under different nitrogen sources
Source: PeerJ. 2020 Nov 10;8:e10351. doi: 10.7717/peerj.10351 (PMC7664463; doi:10.7717/peerj.10351)
Supplement: Supplemental Information 2 — A is nitrate removal; B is ammonium removal. Error bars represent the standard deviation for three replicates. [file peerj-08-10351-s002.xlsx]

## Sheet: Sheet1
Fig. 2A
Dosage of CuO NPs (mg/L)	Fe2+ OD600	standard deviation	OD600	standard deviation	Fe2+ NO3- removal efficiency (%)	standard deviation	NO3- removal efficiency (%)	standard deviation
0	1.66	0.03802	0.88767	0.02747	0.6977	0.01585	0.4229	0.003
1	2.13733	0.02544	1.12167	0.02892	0.8893	0.01646	0.4736	0.01273
5	1.86767	0.04018	0.595	0.05023	0.8051	0.01653	0.3202	0
10	0.82867	0.09025	0.046	0.03219	0.3617	0.04264	0.0372	0.0234
20	0.05533	0.00928	0	0	0.0247	0.01291	0.0205	0.02046
Fig. 2A
Dosage of CuO NPs (mg/L)	Fe2+ OD600	standard deviation	OD600	standard deviation	Fe2+ NH4+ removal efficiency (%)	standard deviation	NH4+ removal efficiency (%)	standard deviation
0	2.20167	0.16468	1.174	0.04271	0.55953	0.01043	0.29827	0.03774
1	2.38467	0.09013	0.004	0.004	0.96715	0.00159	0.22752	0.00979
5	1.01233	0.22088	0.183	0.01901	0.38113	0.07791	0.12328	0.00444
10	0.409	0.1312	0.02733	0.01214	0.20705	0.05422	0.03125	0.000828
20	0.08067	0.00825	0.000667	0.0003333	0.07431	0.00869	0.02327	0.00597
