# Supplementary material for: Exogenous Fe2+ alleviated the toxicity of CuO nanoparticles on Pseudomonas tolaasii Y-11 under different nitrogen sources
Source: PeerJ. 2020 Nov 10;8:e10351. doi: 10.7717/peerj.10351 (PMC7664463; doi:10.7717/peerj.10351)
Supplement: Supplemental Information 3 — A is a nitrate source; B is an ammonium source. Error bars represent the standard deviation for three replicates. [file peerj-08-10351-s003.xlsx]

## Sheet: Sheet1
Fig.3 A
Dosage of CuO NPs(mg/L)	Cu2+ (mg/L)	standard deviation	Fe2+ Cu2+ (mg/L)	standard deviation	lose of Fe2+ (mg/L)	standard deviation
1	0.1263	0.01276	0.0081	0.000343	3.0501	0.03672
5	1.57517	0.00191	0.0134	0.000234	5.967	0.06686
10	1.0664	0.00393	0.432	0.01166	2.20265	0.02485
20	1.0939	0.00439	1.739	0.0095	1.14865	0.01238
Fig.3 B
Dosage of CuO NPs(mg/L)	Fe2+ Cu2+ (mg/L)	standard deviation	Cu2+ (mg/L)	standard deviation	lose of Fe2+ (mg/L)	standard deviation
1	0.0003	0.0003	0.0094	0.0002082	0.113	0.00405
5	0.0075	0.0002887	0.00957	0.0002963	0.0753	0.00099
10	0.01603	0.0001453	0.0429	0.0003055	0.0777	0.00058
20	0.05717	0.00142	0.09503	0.00286	0.0861	0.00309
