# Supplementary material for: Exogenous Fe2+ alleviated the toxicity of CuO nanoparticles on Pseudomonas tolaasii Y-11 under different nitrogen sources
Source: PeerJ. 2020 Nov 10;8:e10351. doi: 10.7717/peerj.10351 (PMC7664463; doi:10.7717/peerj.10351)
Supplement: Supplemental Information 4 — A is a nitrate source; B is an ammonium source. Error bars represent the standard deviation for three replicates. [file peerj-08-10351-s004.xlsx]

## Sheet: Sheet1
Fig. 4A
Dosage of Cu2+ (mg/L)	Fe2+ OD600	standard deviation	OD600	standard deviation	Fe2+ NO3- removal efficiency（%)	standard deviation	NO3- removal efficiency（%)	standard deviation
0	1.5535	0.03435	0.66733	0.00857	0.66807	0.01133	0.32209	0.00209
0.01	2.17533	0.01868	0	0	0.93096	0.01146	0	0
0.1	0	0	0	0	0	0	0	0
0.5	0	0	0	0	0	0	0	0
1	0	0	0	0	0	0	0	0
Fig. 4B
Dosage of Cu2+ (mg/L)	Fe2+ OD600	standard deviation	OD600	standard deviation	Fe2+ NH4+ removal efficiency（%)	standard deviation	NH4+ removal efficiency（%)	standard deviation
0	2.366	0.0358	1.0523	0.05629	0.96786	0.0009378	0.89238	0.04045
0.01	2.8577	0.08679	2.125	0.01513	0.96598	0.00151	0.96519	0.0011
0.05	2.696	0.02223	1.1087	0.00524	0.96822	0.0005083	0.66557	0.01231
0.1	2.7617	0.08576	0.1523	0.03152	0.96859	0.00127	0.14726	0.0223
0.15	2.6967	0.01484	0	0	0.96981	0.0004748	0.08722	0.00686
