# Supplementary material for: Exogenous Fe2+ alleviated the toxicity of CuO nanoparticles on Pseudomonas tolaasii Y-11 under different nitrogen sources
Source: PeerJ. 2020 Nov 10;8:e10351. doi: 10.7717/peerj.10351 (PMC7664463; doi:10.7717/peerj.10351)
Supplement: Supplemental Information 5 [file peerj-08-10351-s005.xlsx]

## Sheet: Sheet1
NO3-								NO3-+Fe2+								NH4+								NH4++Fe2+
1 mg/L		5 mg/L		10 mg/L		20 mg/L		1 mg/L		5 mg/L		10 mg/L		20 mg/L		1 mg/L		5 mg/L		10 mg/L		20 mg/L		1 mg/L		5 mg/L		10 mg/L		20 mg/L
d(nm)	G(d)	d(nm)	G(d)	d(nm)	G(d)	d(nm)	G(d)	d(nm)	G(d)	d(nm)	G(d)	d(nm)	G(d)	d(nm)	G(d)	d(nm)	G(d)	d(nm)	G(d)	d(nm)	G(d)	d(nm)	G(d)	d(nm)	G(d)	d(nm)	G(d)	d(nm)	G(d)	d(nm)	G(d)
459.45	6.64	199.98	6.64	224.88	6.64	306.42	6.64	671	6.64	611.58	6.64	552.82	6.64	489.14	6.64	196.66	6.64	205.53	6.64	241.98	6.64	304.21	6.64	440.23	6.64	318.3	6.64	423.38	6.64	370.49	6.64
545.91	12.13	230.25	12.13	258.99	12.13	356.97	12.13	784.56	12.13	713.43	12.13	644.49	12.13	571.5	12.13	229.25	12.13	238.91	12.13	280.01	12.13	354.09	12.13	511.02	12.13	372.35	12.13	492.67	12.13	430.88	12.13
608.46	17.05	251.61	17.05	283.06	17.05	392.95	17.05	865.65	17.05	786.03	17.05	709.81	17.05	630.28	17.05	252.46	17.05	262.62	17.05	306.94	17.05	389.58	17.05	561.28	17.05	410.96	17.05	541.95	17.05	473.82	17.05
660.14	21.59	268.95	21.59	302.6	21.59	422.36	21.59	932.05	21.59	845.41	21.59	763.2	21.59	678.4	21.59	271.44	21.59	281.98	21.59	328.87	21.59	418.57	21.59	602.27	21.59	442.59	21.59	582.2	21.59	508.88	21.59
705.5	25.85	283.96	25.85	319.53	25.85	447.96	25.85	989.95	25.85	897.13	25.85	809.7	25.85	720.34	25.85	287.97	25.85	298.82	25.85	347.9	25.85	443.79	25.85	637.9	25.85	470.17	25.85	617.23	25.85	539.38	25.85
746.46	29.85	297.37	29.85	334.65	29.85	470.91	29.85	1041.92	29.85	943.52	29.85	851.4	29.85	757.98	29.85	302.79	29.85	313.9	29.85	364.93	29.85	466.4	29.85	669.8	29.85	494.94	29.85	648.61	29.85	566.71	29.85
784.37	33.65	309.66	33.65	348.5	33.65	492.03	33.65	1089.79	33.65	986.21	33.65	889.77	33.65	792.64	33.65	316.42	33.65	327.77	33.65	380.55	33.65	487.2	33.65	699.12	33.65	517.75	33.65	677.47	33.65	591.84	33.65
820.07	37.27	321.14	37.27	361.44	37.27	511.81	37.27	1134.68	37.27	1026.22	37.27	925.73	37.27	825.13	37.27	329.2	37.27	340.75	37.27	395.17	37.27	506.67	37.27	726.56	37.27	539.14	37.27	704.51	37.27	615.37	37.27
850.45	40.37	330.83	40.37	372.37	40.37	528.56	40.37	1172.72	40.37	1060.11	40.37	956.17	40.37	852.67	40.37	340.02	40.37	351.74	40.37	407.52	40.37	523.16	40.37	749.77	40.37	557.27	40.37	727.39	40.37	635.28	40.37
885.82	43.97	342.04	43.97	385.01	43.97	547.98	43.97	1216.87	43.97	1099.43	43.97	991.49	43.97	884.62	43.97	352.57	43.97	364.47	43.97	421.83	43.97	542.27	43.97	776.67	43.97	578.32	43.97	753.92	43.97	658.36	43.97
916.9	47.11	351.83	47.11	396.04	47.11	564.97	47.11	1255.52	47.11	1133.83	47.11	1022.38	47.11	912.58	47.11	363.55	47.11	375.61	47.11	434.32	47.11	558.99	47.11	800.18	47.11	596.75	47.11	777.12	47.11	678.55	47.11
947.29	50.14	361.33	50.14	406.76	50.14	581.52	50.14	1293.19	50.14	1167.34	50.14	1052.48	50.14	939.84	50.14	374.24	50.14	386.45	50.14	446.48	50.14	575.27	50.14	823.06	50.14	614.71	50.14	799.71	50.14	698.21	50.14
976.85	53.05	370.52	53.05	417.13	53.05	597.55	53.05	1329.72	53.05	1199.83	53.05	1081.65	53.05	966.26	53.05	384.61	53.05	396.95	53.05	458.24	53.05	591.05	53.05	845.22	53.05	632.14	53.05	821.6	53.05	717.25	53.05
1005.43	55.81	379.36	55.81	427.1	55.81	613.01	55.81	1364.96	55.81	1231.14	55.81	1109.77	55.81	991.75	55.81	394.6	55.81	407.06	55.81	469.57	55.81	606.25	55.81	866.57	55.81	648.94	55.81	842.7	55.81	735.6	55.81
1033.56	58.47	388.02	58.47	436.86	58.47	628.17	58.47	1399.53	58.47	1261.87	58.47	1137.36	58.47	1016.75	58.47	404.4	58.47	416.98	58.47	480.66	58.47	621.16	58.47	887.5	58.47	665.43	58.47	863.38	58.47	753.59	58.47
1061.14	61.02	396.46	61.02	446.39	61.02	642.99	61.02	1433.36	61.02	1291.91	61.02	1164.32	61.02	1041.21	61.02	413.98	61.02	426.68	61.02	491.5	61.02	635.73	61.02	907.94	61.02	681.56	61.02	883.6	61.02	771.17	61.02
1088.09	63.44	404.68	63.44	455.65	63.44	657.43	63.44	1466.33	63.44	1321.18	63.44	1190.6	63.44	1065.05	63.44	423.32	63.44	436.12	63.44	502.04	63.44	649.93	63.44	927.85	63.44	697.29	63.44	903.29	63.44	788.29	63.44
1115.02	65.8	412.85	65.8	464.87	65.8	671.82	65.8	1499.2	65.8	1350.36	65.8	1216.79	65.8	1088.81	65.8	432.63	65.8	445.52	65.8	512.54	65.8	664.07	65.8	947.68	65.8	712.98	65.8	922.92	65.8	805.36	65.8
1141.2	68.01	420.76	68.01	473.79	68.01	685.76	68.01	1531.07	68.01	1378.64	68.01	1242.17	68.01	1111.85	68.01	441.65	68.01	454.63	68.01	522.71	68.01	677.78	68.01	966.88	68.01	728.18	68.01	941.93	68.01	821.89	68.01
1167.25	70.15	428.59	70.15	482.63	70.15	699.6	70.15	1562.73	70.15	1406.73	70.15	1267.38	70.15	1134.74	70.15	450.6	70.15	463.68	70.15	532.79	70.15	691.38	70.15	985.94	70.15	743.29	70.15	960.81	70.15	838.3	70.15
1193.9	72.27	436.58	72.27	491.63	72.27	713.73	72.27	1595.05	72.27	1435.38	72.27	1293.09	72.27	1158.09	72.27	459.74	72.27	472.9	72.27	543.07	72.27	705.26	72.27	1005.38	72.27	758.71	72.27	980.06	72.27	855.03	72.27
1219.62	74.23	444.25	74.23	500.29	74.23	727.33	74.23	1626.18	74.23	1462.99	74.23	1317.86	74.23	1180.59	74.23	468.53	74.23	481.78	74.23	552.96	74.23	718.63	74.23	1024.08	74.23	773.56	74.23	998.59	74.23	871.15	74.23
1245.12	76.1	451.83	76.1	508.85	76.1	740.77	76.1	1656.98	76.1	1490.28	76.1	1342.35	76.1	1202.85	76.1	477.23	76.1	490.56	76.1	562.73	76.1	731.84	76.1	1042.57	76.1	788.26	76.1	1016.92	76.1	887.08	76.1
1271.15	77.94	459.54	77.94	517.54	77.94	754.47	77.94	1688.36	77.94	1518.09	77.94	1367.29	77.94	1225.52	77.94	486.1	77.94	499.5	77.94	572.68	77.94	745.29	77.94	1061.4	77.94	803.24	77.94	1035.59	77.94	903.3	77.94
1296.91	79.68	467.14	79.68	526.12	79.68	767.99	79.68	1719.36	79.68	1545.54	79.68	1391.92	79.68	1247.92	79.68	494.85	79.68	508.32	79.68	582.49	79.68	758.58	79.68	1079.98	79.68	818.03	79.68	1054.01	79.68	919.31	79.68
1322.37	81.32	474.63	81.32	534.56	81.32	781.33	81.32	1749.93	81.32	1572.62	81.32	1416.21	81.32	1270	81.32	503.48	81.32	517.01	81.32	592.15	81.32	771.67	81.32	1098.28	81.32	832.62	81.32	1072.17	81.32	935.1	81.32
1347.48	82.87	481.98	82.87	542.86	82.87	794.45	82.87	1780.03	82.87	1599.27	82.87	1440.11	82.87	1291.75	82.87	511.97	82.87	525.57	82.87	601.65	82.87	784.56	82.87	1116.29	82.87	846.99	82.87	1090.05	82.87	950.63	82.87
1373.07	84.37	489.45	84.37	551.29	84.37	807.79	84.37	1810.66	84.37	1626.37	84.37	1464.42	84.37	1313.86	84.37	520.6	84.37	534.27	84.37	611.31	84.37	797.66	84.37	1134.6	84.37	861.61	84.37	1108.22	84.37	966.42	84.37
1399.14	85.82	497.04	85.82	559.85	85.82	821.36	85.82	1841.8	85.82	1653.94	85.82	1489.14	85.82	1336.36	85.82	529.38	85.82	543.11	85.82	621.12	85.82	810.99	85.82	1153.21	85.82	876.48	85.82	1126.69	85.82	982.47	85.82
1424.81	87.17	504.48	87.17	568.25	87.17	834.69	87.17	1872.42	87.17	1681.02	87.17	1513.43	87.17	1358.47	87.17	538.01	87.17	551.79	87.17	630.76	87.17	824.07	87.17	1171.49	87.17	891.1	87.17	1144.84	87.17	998.24	87.17
1450.05	88.43	511.78	88.43	576.48	88.43	847.77	88.43	1902.47	88.43	1707.6	88.43	1537.26	88.43	1380.17	88.43	546.48	88.43	560.31	88.43	640.2	88.43	836.91	88.43	1189.41	88.43	905.44	88.43	1162.65	88.43	1013.71	88.43
1475.73	89.63	519.18	89.63	584.83	89.63	861.05	89.63	1933	89.63	1734.59	89.63	1561.46	89.63	1402.21	89.63	555.08	89.63	568.96	89.63	649.79	89.63	849.95	89.63	1207.61	89.63	920.02	89.63	1180.73	89.63	1029.42	89.63
1501.87	90.77	526.68	90.77	593.3	90.77	874.54	90.77	1964.01	90.77	1762.02	90.77	1586.05	90.77	1424.61	90.77	563.81	90.77	577.75	90.77	659.52	90.77	863.19	90.77	1226.08	90.77	934.83	90.77	1199.09	90.77	1045.37	90.77
1528.47	91.86	534.3	91.86	601.89	91.86	888.24	91.86	1995.53	91.86	1789.87	91.86	1611.02	91.86	1447.36	91.86	572.68	91.86	586.67	91.86	669.39	91.86	876.64	91.86	1244.84	91.86	949.87	91.86	1217.73	91.86	1061.56	91.86
1554.56	92.86	541.74	92.86	610.3	92.86	901.65	92.86	2026.4	92.86	1817.15	92.86	1635.48	92.86	1469.65	92.86	581.37	92.86	595.4	92.86	679.05	92.86	889.8	92.86	1263.2	92.86	964.61	92.86	1235.99	92.86	1077.42	92.86
1581.11	93.79	549.29	93.79	618.82	93.79	915.27	93.79	2057.74	93.79	1844.84	93.79	1660.3	93.79	1492.28	93.79	590.19	93.79	604.26	93.79	688.85	93.79	903.17	93.79	1281.83	93.79	979.58	93.79	1254.52	93.79	1093.51	93.79
1607.09	94.64	556.66	94.64	627.14	94.64	928.58	94.64	2088.39	94.64	1871.91	94.64	1684.56	94.64	1514.4	94.64	598.81	94.64	612.91	94.64	698.43	94.64	916.23	94.64	1300.03	94.64	994.22	94.64	1272.62	94.64	1109.24	94.64
1634.53	95.46	564.42	95.46	635.9	95.46	942.6	95.46	2120.69	95.46	1900.43	95.46	1710.13	95.46	1537.71	95.46	607.89	95.46	622.04	95.46	708.51	95.46	929.99	95.46	1319.2	95.46	1009.65	95.46	1291.7	95.46	1125.8	95.46
1661.4	96.18	572	96.18	644.44	96.18	956.3	96.18	2152.28	96.18	1928.32	96.18	1735.12	96.18	1560.51	96.18	616.77	96.18	630.95	96.18	718.35	96.18	943.43	96.18	1337.93	96.18	1024.73	96.18	1310.34	96.18	1141.99	96.18
1688.7	96.85	579.67	96.85	653.11	96.85	970.21	96.85	2184.33	96.85	1956.61	96.85	1760.47	96.85	1583.64	96.85	625.77	96.85	639.99	96.85	728.33	96.85	957.07	96.85	1356.92	96.85	1040.04	96.85	1329.25	96.85	1158.41	96.85
1715.38	97.43	587.15	97.43	661.55	97.43	983.77	97.43	2215.6	97.43	1984.2	97.43	1785.2	97.43	1606.2	97.43	634.56	97.43	648.8	97.43	738.06	97.43	970.37	97.43	1375.44	97.43	1054.98	97.43	1347.69	97.43	1174.43	97.43
1743.58	97.98	595.03	97.98	670.44	97.98	998.07	97.98	2248.59	97.98	2013.31	97.98	1811.29	97.98	1630.01	97.98	643.82	97.98	658.1	97.98	748.32	97.98	984.4	97.98	1394.97	97.98	1070.74	97.98	1367.14	97.98	1191.32	97.98
1772.23	98.46	603.01	98.46	679.45	98.46	1012.58	98.46	2282.08	98.46	2042.85	98.46	1837.76	98.46	1654.17	98.46	653.22	98.46	667.52	98.46	758.72	98.46	998.64	98.46	1414.78	98.46	1086.73	98.46	1386.87	98.46	1208.45	98.46
1800.23	98.87	610.79	98.87	688.23	98.87	1026.74	98.87	2314.74	98.87	2071.66	98.87	1863.57	98.87	1677.74	98.87	662.39	98.87	676.72	98.87	768.85	98.87	1012.51	98.87	1434.09	98.87	1102.34	98.87	1406.11	98.87	1225.15	98.87
1828.68	99.21	618.67	99.21	697.12	99.21	1041.09	99.21	2347.88	99.21	2100.87	99.21	1889.75	99.21	1701.65	99.21	671.69	99.21	686.04	99.21	779.12	99.21	1026.59	99.21	1453.66	99.21	1118.17	99.21	1425.62	99.21	1242.08	99.21
1858.73	99.5	626.97	99.5	706.49	99.5	1056.22	99.5	2382.84	99.5	2131.7	99.5	1917.36	99.5	1726.87	99.5	681.5	99.5	695.87	99.5	789.95	99.5	1041.43	99.5	1474.3	99.5	1134.87	99.5	1446.2	99.5	1259.95	99.5
1887.74	99.72	634.96	99.72	715.51	99.72	1070.81	99.72	2416.54	99.72	2161.4	99.72	1943.97	99.72	1751.18	99.72	690.95	99.72	705.33	99.72	800.37	99.72	1055.73	99.72	1494.18	99.72	1150.97	99.72	1466.02	99.72	1277.15	99.72
1917.69	99.87	643.18	99.87	724.8	99.87	1085.83	99.87	2451.27	99.87	2192	99.87	1971.38	99.87	1776.23	99.87	700.69	99.87	715.09	99.87	811.11	99.87	1070.46	99.87	1514.65	99.87	1167.57	99.87	1486.44	99.87	1294.88	99.87
1947.62	99.97	651.38	99.97	734.05	99.97	1100.82	99.97	2485.94	99.97	2222.54	99.97	1998.74	99.97	1801.23	99.97	710.4	99.97	724.82	99.97	821.81	99.97	1085.16	99.97	1535.08	99.97	1184.13	99.97	1506.81	99.97	1312.56	99.97
1979.01	100	659.95	100	743.73	100	1116.52	100	2522.24	100	2254.52	100	2027.38	100	1827.41	100	720.57	100	735	100	833.01	100	1100.54	100	1556.45	100	1201.48	100	1528.13	100	1331.07	100
2010.91	99.97	668.63	99.97	753.53	99.97	1132.44	99.97	2559.08	99.97	2286.95	99.97	2056.43	99.97	1853.98	99.97	730.89	99.97	745.33	99.97	844.36	99.97	1116.15	99.97	1578.12	99.97	1219.08	99.97	1549.76	99.97	1349.84	99.97
2042.29	99.87	677.15	99.87	763.15	99.87	1148.07	99.87	2595.27	99.87	2318.82	99.87	2084.97	99.87	1880.07	99.87	741.03	99.87	755.47	99.87	855.5	99.87	1131.47	99.87	1599.4	99.87	1236.38	99.87	1571	99.87	1368.27	99.87
2074.69	99.72	685.92	99.72	773.05	99.72	1164.18	99.72	2632.57	99.72	2351.65	99.72	2114.37	99.72	1906.97	99.72	751.47	99.72	765.91	99.72	866.98	99.72	1147.26	99.72	1621.31	99.72	1254.21	99.72	1592.88	99.72	1387.26	99.72
2107.07	99.5	694.66	99.5	782.92	99.5	1180.26	99.5	2669.8	99.5	2384.42	99.5	2143.72	99.5	1933.81	99.5	761.89	99.5	776.34	99.5	878.42	99.5	1163.01	99.5	1643.17	99.5	1272	99.5	1614.71	99.5	1406.2	99.5
2141.7	99.21	703.99	99.21	793.44	99.21	1197.42	99.21	2709.56	99.21	2419.4	99.21	2175.04	99.21	1962.48	99.21	773.02	99.21	787.46	99.21	890.62	99.21	1179.83	99.21	1666.5	99.21	1291	99.21	1638.02	99.21	1426.42	99.21
2175.54	98.87	713.07	98.87	803.7	98.87	1214.15	98.87	2748.34	98.87	2453.52	98.87	2205.59	98.87	1990.44	98.87	783.87	98.87	798.3	98.87	902.52	98.87	1196.22	98.87	1689.25	98.87	1309.54	98.87	1660.74	98.87	1446.14	98.87
2000.97	99.98	665.93	99.98	750.48	99.98	1127.48	99.98	2547.61	99.98	2276.86	99.98	2047.39	99.98	1845.71	99.98	727.68	99.98	742.11	99.98	840.83	99.98	1111.29	99.98	1571.37	99.98	1213.6	99.98	1543.03	99.98	1343.99	99.98
2246.23	97.98	731.96	97.98	825.02	97.98	1249.02	97.98	2829.2	97.98	2524.62	97.98	2269.25	97.98	2048.72	97.98	806.48	97.98	820.89	97.98	927.29	97.98	1230.38	97.98	1736.62	97.98	1348.19	97.98	1708.08	97.98	1487.21	97.98
2283.15	97.43	741.78	97.43	836.11	97.43	1267.18	97.43	2871.33	97.43	2561.66	97.43	2302.41	97.43	2079.09	97.43	818.25	97.43	832.65	97.43	940.17	97.43	1248.17	97.43	1761.27	97.43	1368.33	97.43	1732.73	97.43	1508.6	97.43
2319.22	96.85	751.34	96.85	846.92	96.85	1284.89	96.85	2912.43	96.85	2597.79	96.85	2334.76	96.85	2108.71	96.85	829.74	96.85	844.12	96.85	952.73	96.85	1265.52	96.85	1785.31	96.85	1387.98	96.85	1756.77	96.85	1529.45	96.85
2357.34	96.18	761.43	96.18	858.3	96.18	1303.57	96.18	2955.81	96.18	2635.9	96.18	2368.87	96.18	2139.97	96.18	841.86	96.18	856.21	96.18	965.97	96.18	1283.82	96.18	1810.66	96.18	1408.72	96.18	1782.12	96.18	1551.44	96.18
2396.08	95.46	771.64	95.46	869.84	95.46	1322.53	95.46	2999.82	95.46	2674.57	95.46	2403.49	95.46	2171.69	95.46	854.15	95.46	868.48	95.46	979.39	95.46	1302.38	95.46	1836.37	95.46	1429.77	95.46	1807.84	95.46	1573.75	95.46
2436.99	94.64	782.4	94.64	881.99	94.64	1342.5	94.64	3046.23	94.64	2715.33	94.64	2439.97	94.64	2205.13	94.64	867.11	94.64	881.41	94.64	993.53	94.64	1321.94	94.64	1863.45	94.64	1451.95	94.64	1834.94	94.64	1597.26	94.64
2477.05	93.79	792.9	93.79	893.84	93.79	1362.02	93.79	3091.59	93.79	2755.17	93.79	2475.62	93.79	2237.81	93.79	879.77	93.79	894.03	93.79	1007.33	93.79	1341.05	93.79	1889.91	93.79	1473.65	93.79	1861.42	93.79	1620.23	93.79
2519.34	92.86	803.95	92.86	906.32	92.86	1382.59	92.86	3139.42	92.86	2797.16	92.86	2513.2	92.86	2272.27	92.86	893.11	92.86	907.34	92.86	1021.87	92.86	1361.19	92.86	1917.78	92.86	1496.51	92.86	1889.33	92.86	1644.43	92.86
2562.35	91.86	815.15	91.86	918.98	91.86	1403.47	91.86	3187.98	91.86	2839.79	91.86	2551.35	91.86	2307.26	91.86	906.66	91.86	920.84	91.86	1036.62	91.86	1381.63	91.86	1946.06	91.86	1519.74	91.86	1917.65	91.86	1668.99	91.86
2607.74	90.77	826.94	90.77	932.29	90.77	1425.46	90.77	3239.14	90.77	2884.68	90.77	2591.52	90.77	2344.11	90.77	920.92	90.77	935.06	90.77	1052.14	90.77	1403.16	90.77	1975.84	90.77	1544.2	90.77	1947.47	90.77	1694.85	90.77
2653.92	89.63	838.89	89.63	945.79	89.63	1447.79	89.63	3291.11	89.63	2930.28	89.63	2632.32	89.63	2381.55	89.63	935.41	89.63	949.49	89.63	1067.9	89.63	1425.02	89.63	2006.06	89.63	1569.06	89.63	1977.76	89.63	1721.11	89.63
2700.93	88.43	851.02	88.43	959.49	88.43	1470.47	88.43	3343.92	88.43	2976.61	88.43	2673.77	88.43	2419.58	88.43	950.13	88.43	964.15	88.43	1083.89	88.43	1447.22	88.43	2036.75	88.43	1594.32	88.43	2008.51	88.43	1747.78	88.43
2748.77	87.17	863.33	87.17	973.39	87.17	1493.51	87.17	3397.58	87.17	3023.66	87.17	2715.87	87.17	2458.23	87.17	965.08	87.17	979.04	87.17	1100.12	87.17	1469.76	87.17	2067.91	87.17	1619.98	87.17	2039.75	87.17	1774.86	87.17
2799.21	85.82	876.26	85.82	987.99	85.82	1517.75	85.82	3454.06	85.82	3073.19	85.82	2760.17	85.82	2498.91	85.82	980.81	85.82	994.69	85.82	1117.18	85.82	1493.48	85.82	2100.69	85.82	1647	85.82	2072.61	85.82	1803.35	85.82
2852.36	84.37	889.84	84.37	1003.33	84.37	1543.24	84.37	3513.48	84.37	3125.27	84.37	2806.76	84.37	2541.69	84.37	997.36	84.37	1011.15	84.37	1135.11	84.37	1518.43	84.37	2135.14	84.37	1675.42	84.37	2107.16	84.37	1833.31	84.37
2906.52	82.87	903.63	82.87	1018.91	82.87	1569.16	82.87	3573.92	82.87	3178.23	82.87	2854.14	82.87	2585.21	82.87	1014.18	82.87	1027.89	82.87	1153.33	82.87	1543.78	82.87	2170.15	82.87	1704.34	82.87	2142.29	82.87	1863.76	82.87
2961.71	81.32	917.64	81.32	1034.73	81.32	1595.51	81.32	3635.4	81.32	3232.09	81.32	2902.31	81.32	2629.48	81.32	1031.29	81.32	1044.9	81.32	1171.84	81.32	1569.57	81.32	2205.75	81.32	1733.75	81.32	2178	81.32	1894.71	81.32
3019.84	79.68	932.33	79.68	1051.34	79.68	1623.21	79.68	3700.05	79.68	3288.71	79.68	2952.95	79.68	2676.02	79.68	1049.27	79.68	1062.77	79.68	1191.28	79.68	1596.66	79.68	2243.14	79.68	1764.68	79.68	2215.53	79.68	1927.24	79.68
3081.05	77.94	947.76	77.94	1068.76	77.94	1652.3	77.94	3767.98	77.94	3348.2	77.94	3006.15	77.94	2724.92	77.94	1068.16	77.94	1081.54	77.94	1211.69	77.94	1625.12	77.94	2282.4	77.94	1797.18	77.94	2254.95	77.94	1961.41	77.94
3145.46	76.1	963.93	76.1	1087.02	76.1	1682.85	76.1	3839.34	76.1	3410.67	76.1	3062.01	76.1	2776.28	76.1	1087.99	76.1	1101.25	76.1	1233.1	76.1	1655	76.1	2323.61	76.1	1831.33	76.1	2296.33	76.1	1997.28	76.1
3211.22	74.23	980.37	74.23	1105.6	74.23	1713.97	74.23	3912.05	74.23	3474.3	74.23	3118.91	74.23	2828.62	74.23	1108.2	74.23	1121.31	74.23	1254.89	74.23	1685.43	74.23	2365.56	74.23	1866.12	74.23	2338.48	74.23	2033.8	74.23
3280.42	72.27	997.61	72.27	1125.08	72.27	1746.63	72.27	3988.41	72.27	3541.11	72.27	3178.64	72.27	2883.57	72.27	1129.41	72.27	1142.37	72.27	1277.74	72.27	1717.36	72.27	2409.57	72.27	1902.66	72.27	2382.71	72.27	2072.13	72.27
3355.31	70.15	1016.19	70.15	1146.07	70.15	1781.89	70.15	4070.88	70.15	3613.24	70.15	3243.14	70.15	2942.92	70.15	1152.3	70.15	1165.09	70.15	1302.39	70.15	1751.84	70.15	2457.07	70.15	1942.13	70.15	2430.45	70.15	2113.5	70.15
3431.91	68.01	1035.12	68.01	1167.46	68.01	1817.86	68.01	4155.06	68.01	3686.85	68.01	3308.94	68.01	3003.49	68.01	1175.67	68.01	1188.27	68.01	1327.51	68.01	1787.01	68.01	2505.51	68.01	1982.42	68.01	2479.15	68.01	2155.69	68.01
3512.46	65.8	1054.94	65.8	1189.86	65.8	1855.59	65.8	4243.4	65.8	3764.06	65.8	3377.96	65.8	3067.05	65.8	1200.17	65.8	1212.57	65.8	1353.84	65.8	1823.89	65.8	2556.28	65.8	2024.7	65.8	2530.22	65.8	2199.94	65.8
3599.41	63.44	1076.25	63.44	1213.93	63.44	1896.2	63.44	4338.53	63.44	3847.2	63.44	3452.27	63.44	3135.49	63.44	1226.56	63.44	1238.72	63.44	1382.16	63.44	1863.58	63.44	2610.92	63.44	2070.24	63.44	2585.19	63.44	2247.56	63.44
3690.82	61.02	1098.54	61.02	1239.12	61.02	1938.78	61.02	4438.33	61.02	3934.38	61.02	3530.18	61.02	3207.28	61.02	1254.22	61.02	1266.13	61.02	1411.82	61.02	1905.2	61.02	2668.17	61.02	2118.01	61.02	2642.82	61.02	2297.48	61.02
3789.31	58.47	1122.45	58.47	1266.14	58.47	1984.52	58.47	4545.59	58.47	4028.04	58.47	3613.89	58.47	3284.42	58.47	1283.94	58.47	1295.56	58.47	1443.64	58.47	1949.89	58.47	2729.63	58.47	2169.36	58.47	2704.7	58.47	2351.08	58.47
3895.31	55.81	1148.06	55.81	1295.08	55.81	2033.6	55.81	4660.73	55.81	4128.56	55.81	3703.7	55.81	3367.23	55.81	1315.83	55.81	1327.13	55.81	1477.76	55.81	1997.84	55.81	2795.53	55.81	2224.49	55.81	2771.09	55.81	2408.58	55.81
4009.3	53.05	1175.46	53.05	1326.04	53.05	2086.2	53.05	4784.23	53.05	4236.33	53.05	3799.99	53.05	3456.04	53.05	1350.01	53.05	1360.95	53.05	1514.28	53.05	2049.22	53.05	2866.14	53.05	2283.62	53.05	2842.23	53.05	2470.19	53.05
4134.39	50.14	1205.36	50.14	1359.83	50.14	2143.73	50.14	4919.39	50.14	4354.22	50.14	3905.32	50.14	3553.21	50.14	1387.4	50.14	1397.93	50.14	1554.18	50.14	2105.42	50.14	2943.31	50.14	2348.34	50.14	2920.03	50.14	2537.56	50.14
4271.41	47.11	1237.92	47.11	1396.63	47.11	2206.52	47.11	5067	47.11	4482.92	47.11	4020.28	47.11	3659.33	47.11	1428.22	47.11	1438.27	47.11	1597.67	47.11	2166.74	47.11	3027.49	47.11	2419.03	47.11	3004.92	47.11	2611.06	47.11
4421.28	43.97	1273.32	43.97	1436.65	43.97	2274.94	43.97	5227.94	43.97	4623.19	43.97	4145.57	43.97	3775.02	43.97	1472.69	43.97	1482.21	43.97	1645	43.97	2233.54	43.97	3119.13	43.97	2496.12	43.97	3097.4	43.97	2691.12	43.97
4605.2	40.37	1316.47	40.37	1485.41	40.37	2358.53	40.37	5424.76	40.37	4794.63	40.37	4298.67	40.37	3916.47	40.37	1527.04	40.37	1535.87	40.37	1702.74	40.37	2315.15	40.37	3231.03	40.37	2590.39	40.37	3210.37	40.37	2788.91	40.37
4775.76	37.27	1356.2	37.27	1530.33	37.27	2435.71	37.27	5606.62	37.27	4952.96	37.27	4440.06	37.27	4047.15	37.27	1577.23	37.27	1585.39	37.27	1755.98	37.27	2390.48	37.27	3334.26	37.27	2677.51	37.27	3314.64	37.27	2879.17	37.27
4993.17	33.65	1406.47	33.65	1587.16	33.65	2533.64	33.65	5837.57	33.65	5153.92	33.65	4619.48	33.65	4213.08	33.65	1640.92	33.65	1648.19	33.65	1823.41	33.65	2486.05	33.65	3465.13	33.65	2788.16	33.65	3446.91	33.65	2993.64	33.65
5246.73	29.85	1464.6	29.85	1652.87	29.85	2647.23	29.85	6105.74	29.85	5387.13	29.85	4827.65	29.85	4405.71	29.85	1714.82	29.85	1721	29.85	1901.5	29.85	2596.88	29.85	3616.79	29.85	2916.66	29.85	3600.29	29.85	3126.36	29.85
5551.33	25.85	1533.76	25.85	1731.07	25.85	2782.86	25.85	6426.3	25.85	5665.69	25.85	5076.27	25.85	4635.91	25.85	1803.07	25.85	1807.86	25.85	1994.54	25.85	2729.17	25.85	3797.67	25.85	3070.29	25.85	3783.37	25.85	3284.75	25.85
5932.83	21.59	1619.41	21.59	1827.91	21.59	2951.55	21.59	6825.49	21.59	6012.3	21.59	5385.55	21.59	4922.52	21.59	1912.84	21.59	1915.81	21.59	2109.97	21.59	2893.65	21.59	4022.35	21.59	3261.63	21.59	4010.96	21.59	3481.62	21.59
6436.68	17.05	1731.02	17.05	1954.12	17.05	3172.44	17.05	7349.07	17.05	6466.47	17.05	5790.7	17.05	5298.32	17.05	2056.64	17.05	2057.04	17.05	2260.7	17.05	3108.97	17.05	4316.12	17.05	3512.65	17.05	4308.87	17.05	3739.25	17.05
7174.16	12.13	1891.55	12.13	2135.68	12.13	3492.25	12.13	8108.65	12.13	7124.51	12.13	6377.52	12.13	5843.28	12.13	2264.9	12.13	2261.26	12.13	2478.11	12.13	3420.56	12.13	4740.6	12.13	3876.92	12.13	4739.9	12.13	4111.89	12.13
8524.25	6.64	2177.94	6.64	2459.65	6.64	4068.28	6.64	9480.91	6.64	8311.08	6.64	7435.13	6.64	6827.24	6.64	2640.22	6.64	2628.42	6.64	2867.56	6.64	3981.39	6.64	5502.92	6.64	4535.27	6.64	5515.54	6.64	4782.16	6.64
